# Supplementary material for: Separation of stereoisomers of dinuclear metal complexes by binding affinity chromatography using non-duplex DNA
Source: Royal Society of Chemistry journal article supplement (doi:10.1039/b603781j), 2006-01-01
Supplement: b603781j.pdf [file b603781j.pdf]

# Supplementary Material (ESI) for Chemical Communications  
# This journal is (c) The Royal Society of Chemistry 2006

**MS: B603781J - Chemical Communications**

**TITLE: Separation of stereoisomers of dinuclear metal complexes by binding affinity chromatography using non-duplex DNA**

**AUTHORS: Jayden A. Smith and F. Richard Keene**

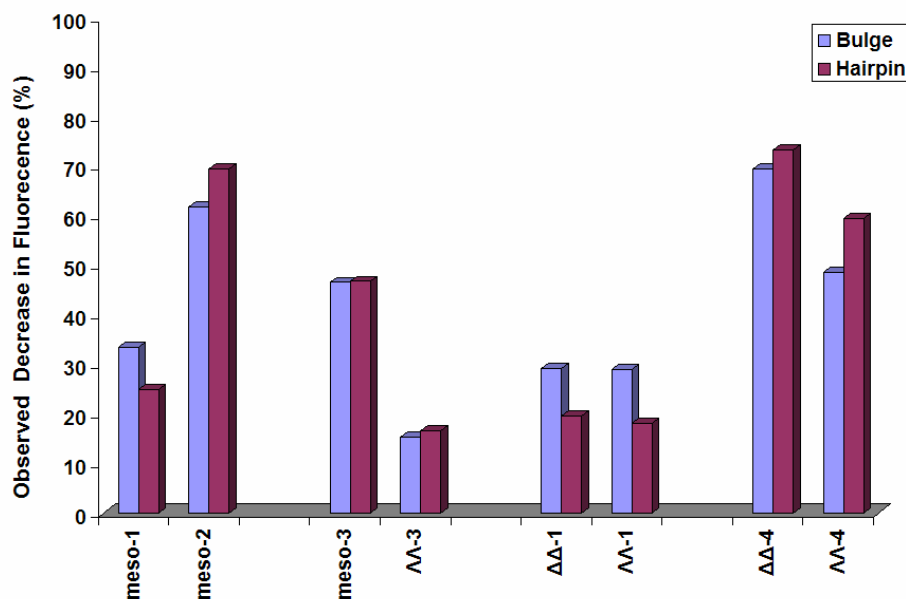

**Fig. S1** Observed Fluorescent Intercalator Displacement (FID) induced by various metal complexes upon binding to bulge- and hairpin-containing oligonucleotides. **1** –  $[\{\text{Ru}(\text{Me}_2\text{bpy})_2\}_2(\mu\text{-bpm})]^{4+}$ ; **2** –  $[\{\text{Ru}(\text{phen})_2\}_2(\mu\text{-HAT})]^{4+}$ ; **3** –  $[\{\text{Ru}(\text{bpy})_2\}_2(\mu\text{-HAT})]^{4+}$ ; **4** –  $[\{\text{Ru}(\text{phen})_2\}_2(\mu\text{-2,3-dpp})]^{4+}$ . As adapted from the method of Boger *et al.*, 20  $\mu\text{L}$  of oligonucleotide (12  $\mu\text{M}$ (base pairs) in 0.1 M Tris / 0.1 M NaCl buffer solution, pH 7.8) and 88  $\mu\text{L}$  of ethidium bromide (6  $\mu\text{M}$  in the same Tris buffer solution) were loaded in each cell of a 96-well plate. Using a plate reader, ten readings were taken on each cell ( $\lambda_{\text{ex}} = 545 \text{ nm}$ ,  $\lambda_{\text{em}} = 595 \text{ nm}$ ) at 25  $^\circ\text{C}$  to provide a 100% emission. The wells were subsequently loaded with an aliquot of the metal complex of interest (10  $\mu\text{L}$  of a 1 mM solution in  $\text{H}_2\text{O}$ ) and an additional 10 emission readings performed after 10 minutes incubation. Each system was measured in quadruplicate. The data was averaged and reported here as the extent of emission decrease observed upon addition of the metal complex.

# Supplementary Material (ESI) for Chemical Communications  
# This journal is (c) The Royal Society of Chemistry 2006

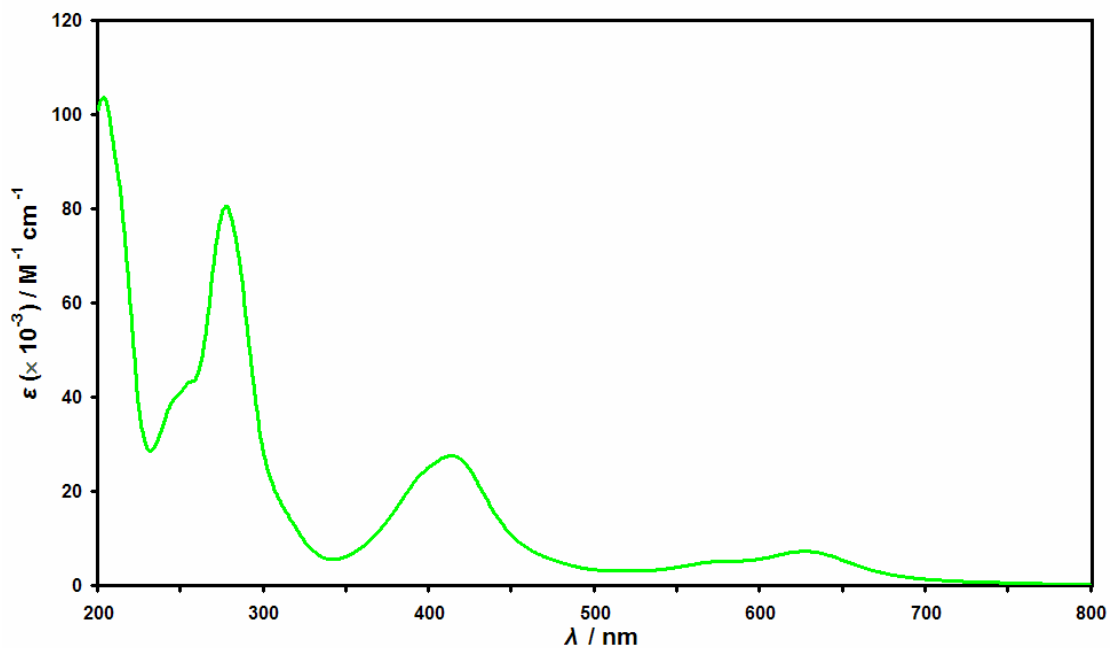

**Fig. S2** UV/Visible absorption spectrum of  $[\{\text{Ru}(\text{Me}_2\text{bpy})_2\}_2(\mu\text{-bpm})]\text{Cl}_4$  in 10 mM  $\text{Na}_3\text{PO}_4/0.075 \text{ M}$   $\text{NaCl}$  (pH 7.5) aqueous buffer solution.

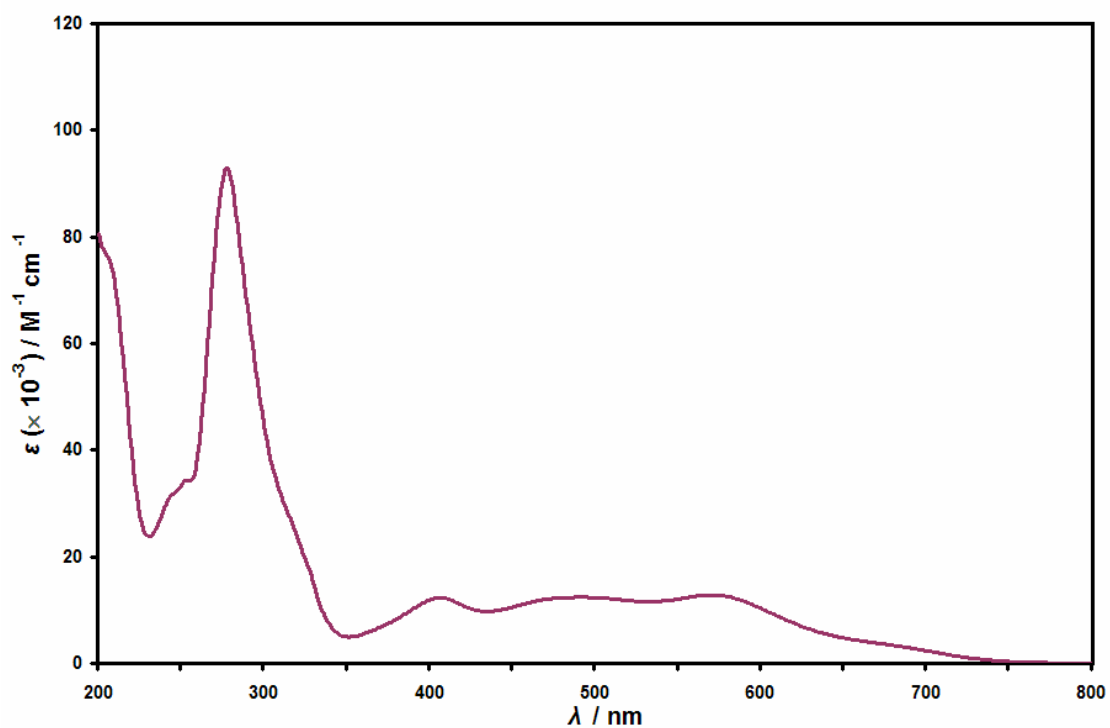

**Fig. S3** UV/Visible absorption spectrum of  $[\{\text{Ru}(\text{phen})_2\}_2(\mu\text{-HAT})]\text{Cl}_4$  in 10 mM  $\text{Na}_3\text{PO}_4/0.075 \text{ M}$   $\text{NaCl}$  (pH 7.5) aqueous buffer solution.

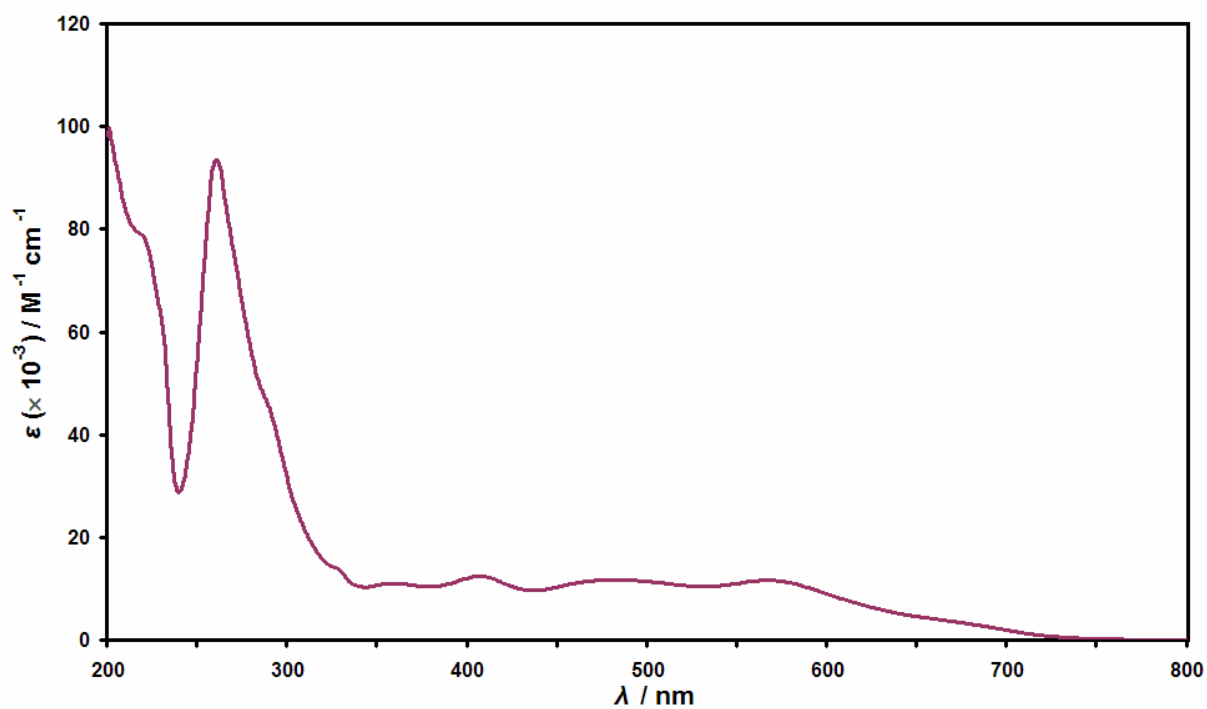

**Fig. S4** UV/Visible absorption spectrum of  $[\{\text{Ru}(\text{phen})_2\}_2(\mu\text{-HAT})]\text{Cl}_4$  in 10 mM  $\text{Na}_3\text{PO}_4/0.075$  M NaCl (pH 7.5) aqueous buffer solution.

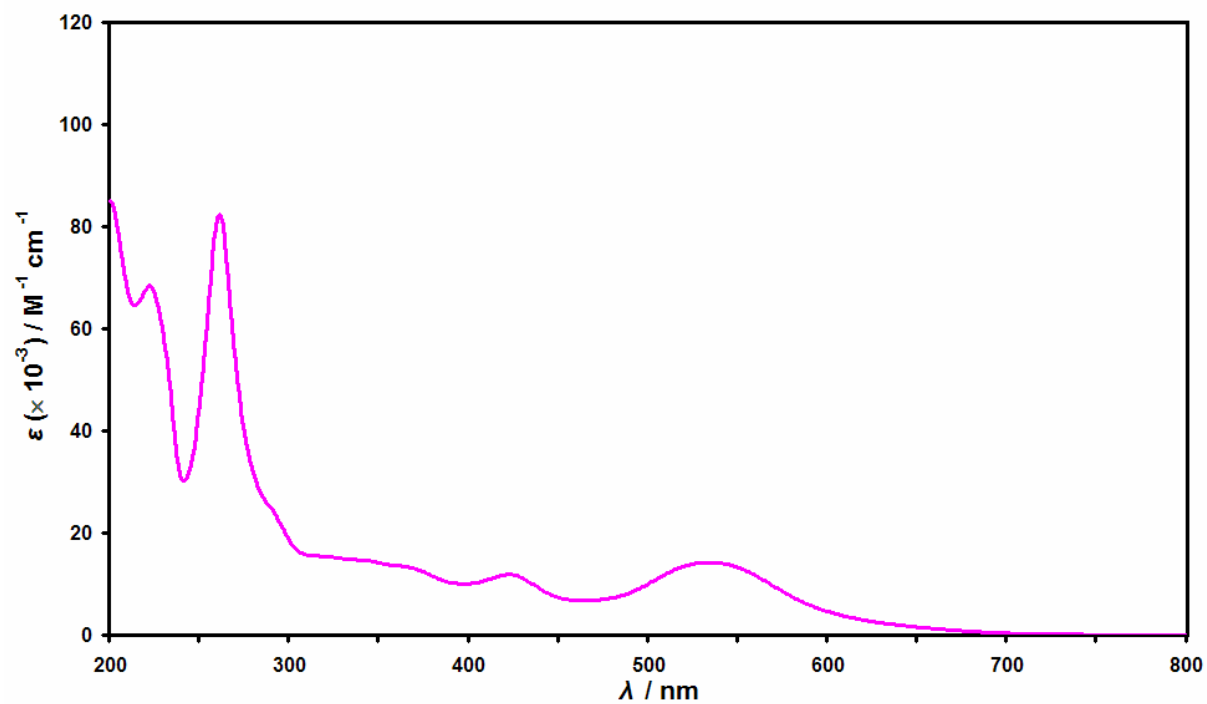

**Fig. S5** UV/Visible absorption spectrum of  $[\{\text{Ru}(\text{phen})_2\}_2(\mu\text{-2,3-dpp})]\text{Cl}_4$  in 10 mM  $\text{Na}_3\text{PO}_4/0.075$  M NaCl (pH 7.5) aqueous buffer solution.
